# Supplementary material for: Immunotoxicity of Silver Nanoparticles (AgNPs) on the Leukocytes of Common Bottlenose Dolphins (Tursiops truncatus)
Source: PubMed Central journal article supplement (PMC5884781; doi:10.1038/s41598-018-23737-0), 2018-04-04
Supplement: 41598_2018_23737_MOESM1_ESM.pdf [file 41598_2018_23737_MOESM1_ESM.pdf]

# **Immunotoxicity of Silver Nanoparticles (AgNPs) on the Leukocytes of Common Bottlenose Dolphins (*Tursiops truncatus*)**

**Wen-Ta Li<sup>1</sup>, Hui-Wen Chang<sup>1</sup>, Wei-Cheng Yang<sup>2</sup>, Chieh Lo<sup>3</sup>, Lei-Ya Wang<sup>1</sup>, Victor Fei Pang<sup>1</sup>, Meng-Hsien Chen<sup>4</sup>, Chian-Ren Jeng<sup>1</sup>**

<sup>1</sup> Graduate Institute of Molecular and Comparative Pathobiology, National Taiwan University, Taipei 10617, Taiwan

<sup>2</sup> College of Veterinary Medicine, National Chiayi University, Chiayi 60004, Taiwan

<sup>3</sup> Farglory Ocean Park, Hualien 97449, Taiwan

<sup>4</sup> Department of Oceanography and Asia-Pacific Ocean Research Center, National Sun Yat-sen University, Kaohsiung 80424, Taiwan

\*Corresponding author: crjeng@ntu.edu.tw

**Supplementary Table S1.** The size distribution and zeta potential of the 20 nm citrate-AgNPs

(C-AgNP<sub>20</sub>).

---

| Concentration (µg/ml) | 100           | 500           |
|-----------------------|---------------|---------------|
| Z-Average (nm)        | 26 ± 0        | 26 ± 0        |
| Size (nm) (intensity) | 30 ± 0 (100%) | 29 ± 0 (100%) |
| Zeta potential (mV)   | -38.97 ± 1.33 | -44.2 ± 1.35  |
| PdI                   | 0.12 ± 0.00   | 0.11 ± 0.01   |

---

Results shown are means ± SD from three different lectures.

NPs were suspended in 2nM citrate buffer and measurements performed at room temperature.

PdI, Poly-dispersity Index.

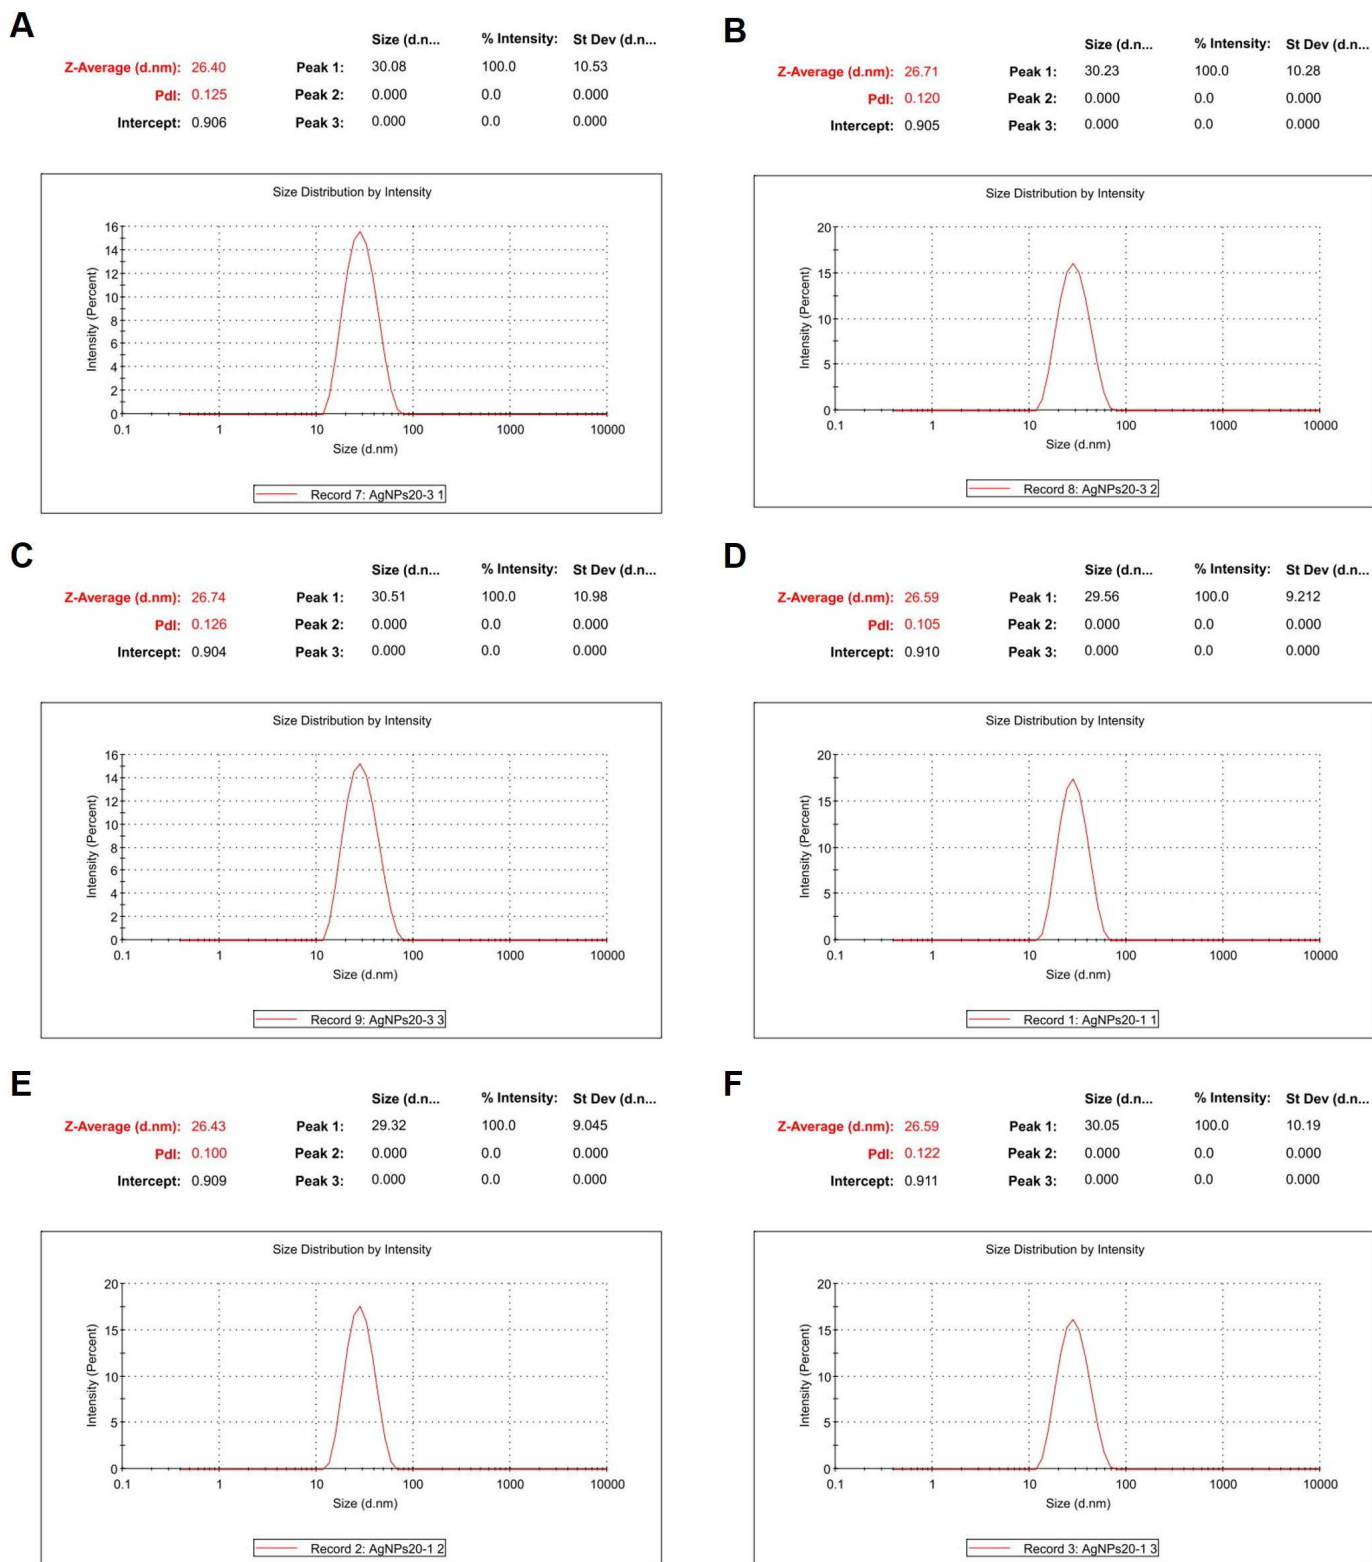

**Supplementary Figure S1.** The size distributions of C-AgNP<sub>20</sub> at 100  $\mu$ g/ml (A to C) and 500  $\mu$ g/ml (D to F).

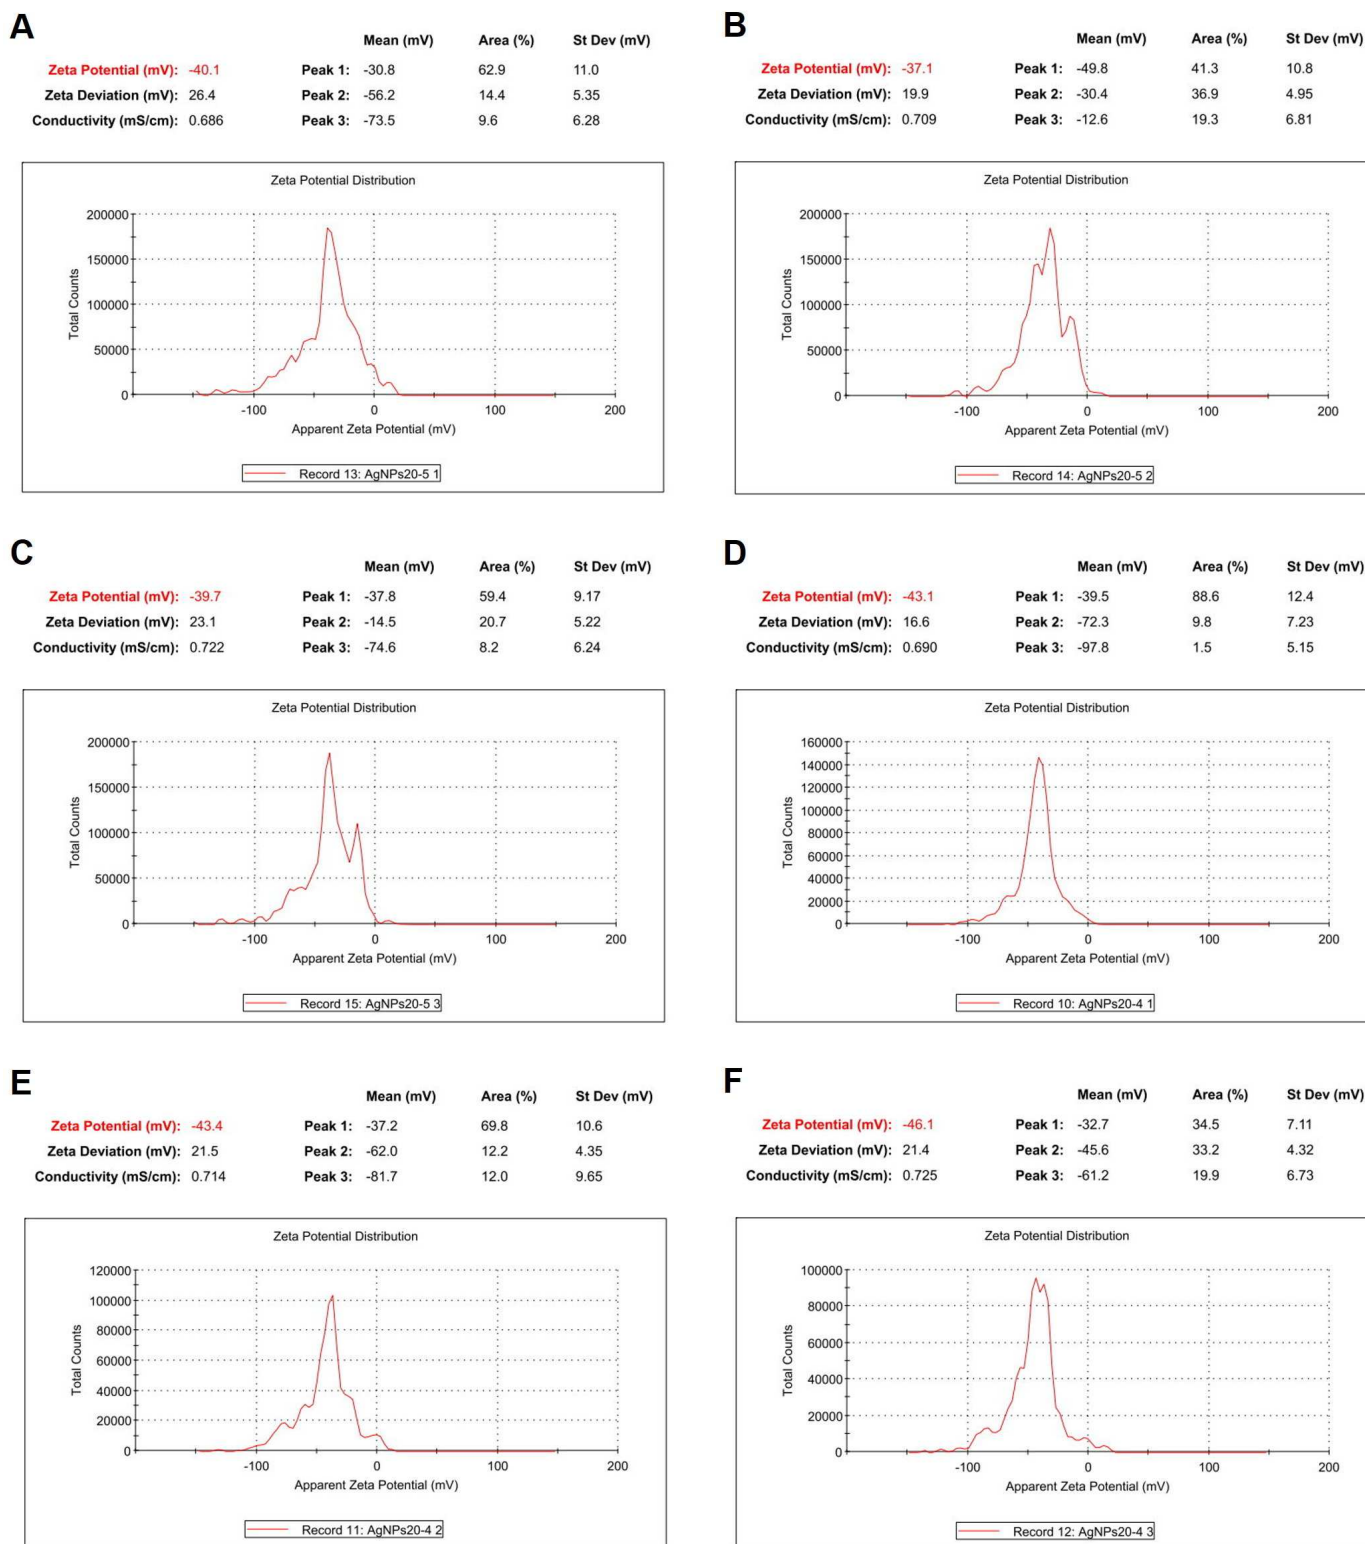

**Supplementary Figure S2.** The zeta potentials of C-AgNP<sub>20</sub> at 100  $\mu\text{g/ml}$  (A to C) and 500  $\mu\text{g/ml}$  (D to F).
